# Supplementary material for: Bone marrow mesenchymal stem cells derived exosomal miRNAs can modulate diabetic bone-fat imbalance
Source: PubMed Central journal article supplement (PMC10145165; doi:10.3389/fendo.2023.1149168), 2023-04-14
Supplement: Image_1.pdf [file Image_1.pdf]

## SUPPLEMENTAL MATERIALS

Supplemental Figure 1. Full length western blot of Exosomes markers CD9, TSG101 and Calnexin

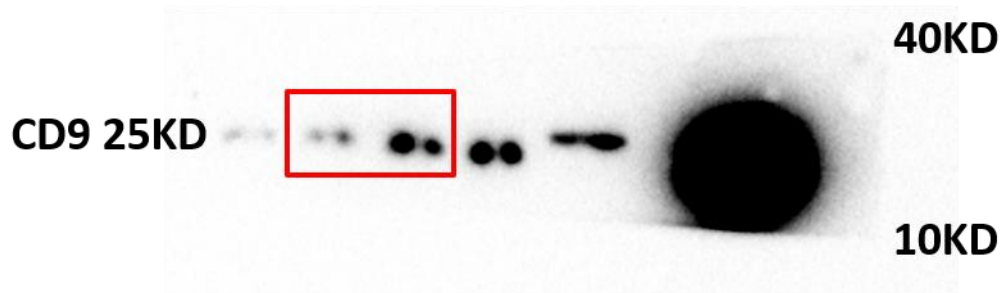

Figure 1A. Full length western blot of Exosomes markers CD9

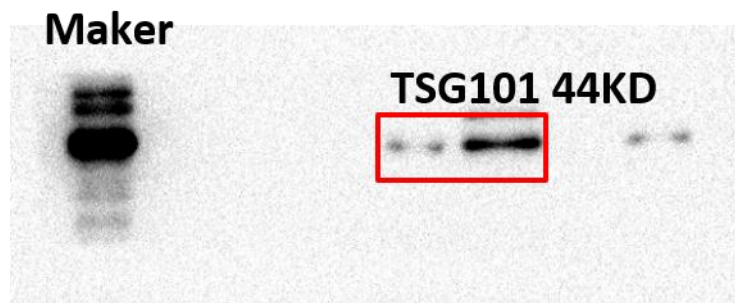

Figure 1B. Full length western blot of Exosomes markers TSG101

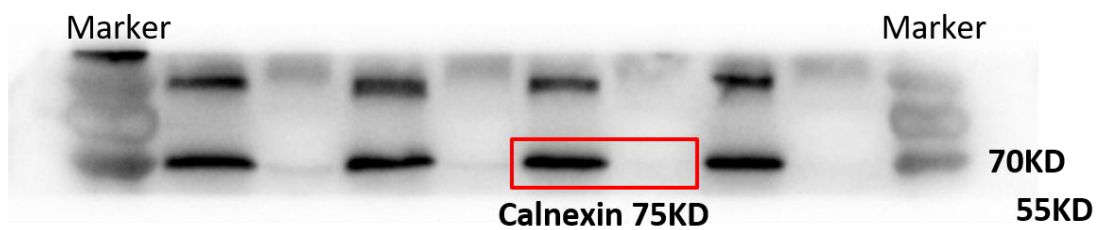

Figure 1C. Full length western blot of Exosomes markers Calnexin
