# Supplementary material for: Bone marrow mesenchymal stem cells derived exosomal miRNAs can modulate diabetic bone-fat imbalance
Source: PubMed Central journal article supplement (PMC10145165; doi:10.3389/fendo.2023.1149168), 2023-04-14
Supplement: Image_2.pdf [file Image_2.pdf]

## SUPPLEMENTAL MATERIALS

Supplemental Figure 2. Full length western blot of RUNX2, ANGPTL2, GAPDH

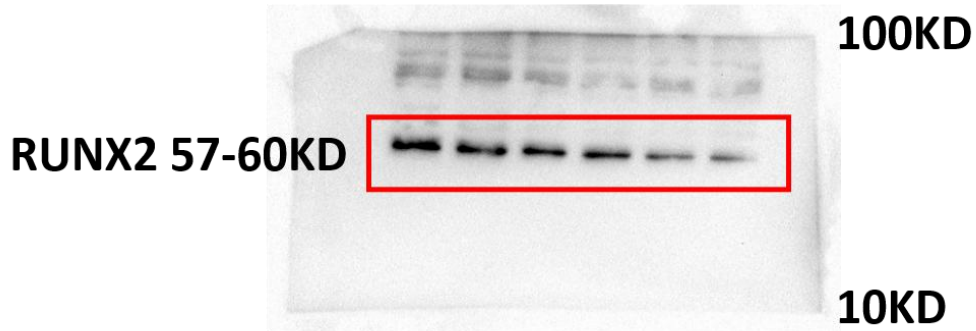

Figure 2A. Full length western blot of RUNX2

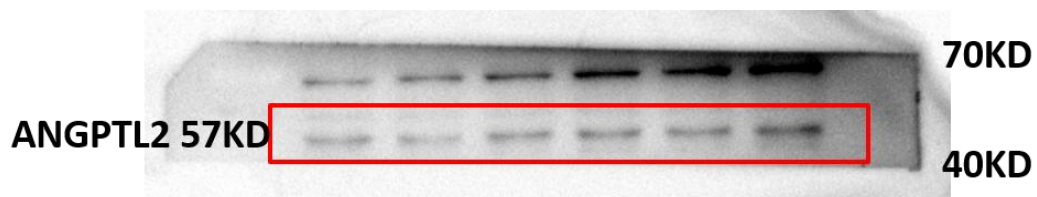

Figure 2B. Full length western blot of ANGPTL2

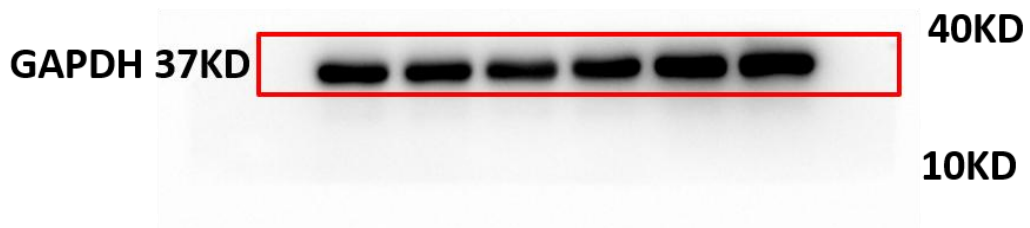

Figure 2C. Full length western blot of GAPDH
