# Supplementary material for: Bone marrow mesenchymal stem cells derived exosomal miRNAs can modulate diabetic bone-fat imbalance
Source: PubMed Central journal article supplement (PMC10145165; doi:10.3389/fendo.2023.1149168), 2023-04-14
Supplement: Image_3.pdf [file Image_3.pdf]

## SUPPLEMENTAL MATERIALS

Supplemental Figure 3. Full length western blot of RUNX2 and GAPDH in normal and diabetic mice

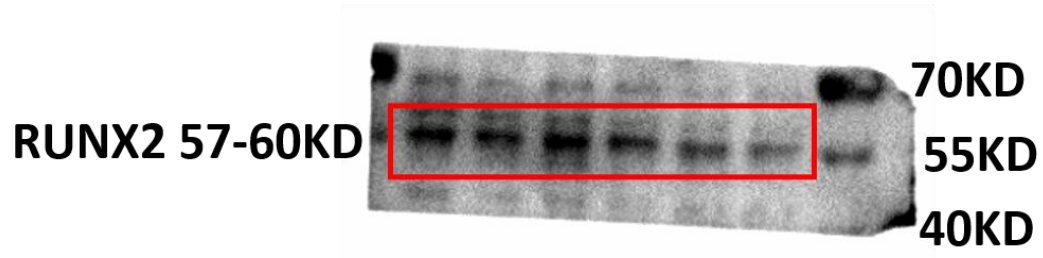

Figure 3A. Full length western blot of RUNX2 in normal and diabetic mice

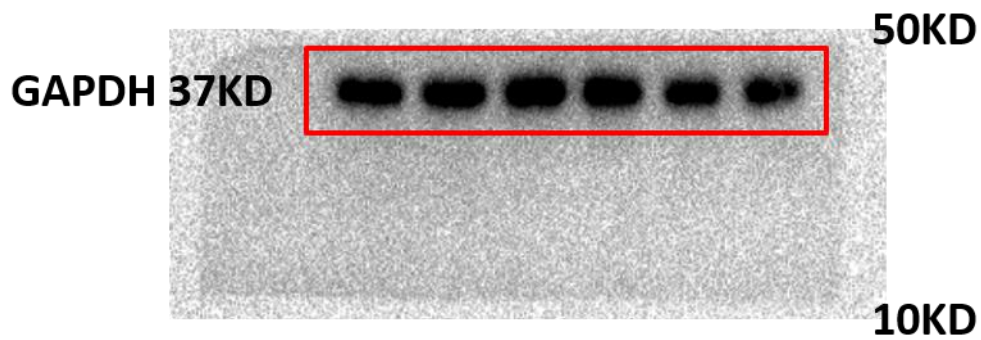

Figure 3B. Full length western blot of GAPDH in normal and diabetic mice
