# Supplementary material for: Bone marrow mesenchymal stem cells derived exosomal miRNAs can modulate diabetic bone-fat imbalance
Source: PubMed Central journal article supplement (PMC10145165; doi:10.3389/fendo.2023.1149168), 2023-04-14

## SUPPLEMENTAL MATERIALS

Supplemental Figure 4. Relative miR-221 expression levels in BMSCs and exosomes

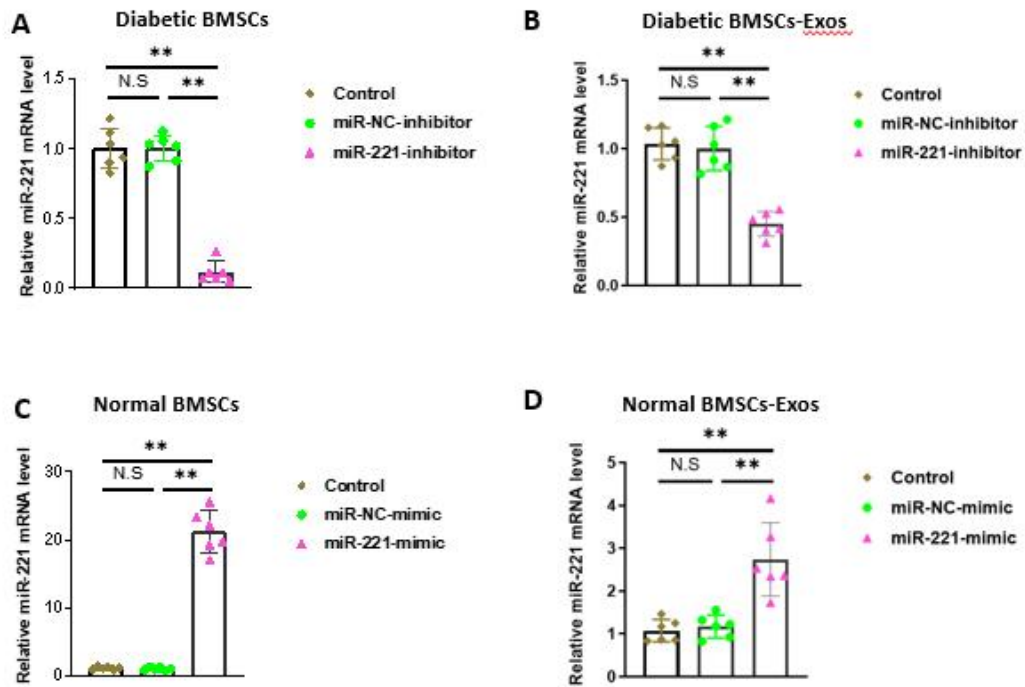

Supplement: Image_4.pdf [file Image_4.pdf]
