# Supplementary material for: Bone marrow mesenchymal stem cells derived exosomal miRNAs can modulate diabetic bone-fat imbalance
Source: PubMed Central journal article supplement (PMC10145165; doi:10.3389/fendo.2023.1149168), 2023-04-14

## SUPPLEMENTAL MATERIALS

Supplemental Figure 5. The effects of miR-221 and BMSCs-Exos on migration of BMSCs

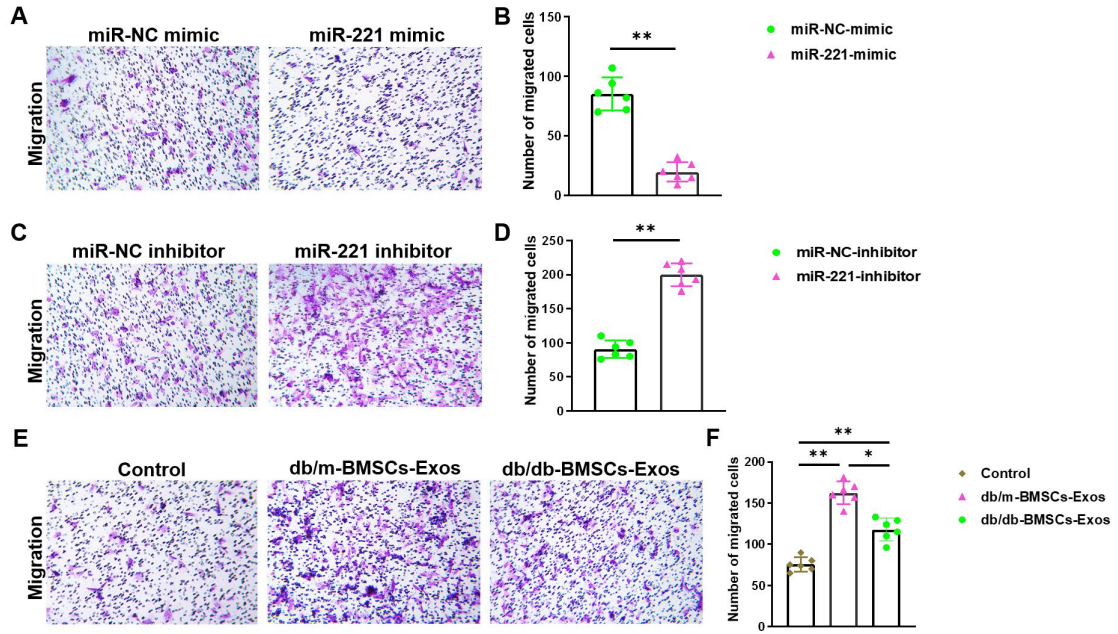

Supplement: Image_5.pdf [file Image_5.pdf]
