# Supplementary material for: Bone marrow mesenchymal stem cells derived exosomal miRNAs can modulate diabetic bone-fat imbalance
Source: PubMed Central journal article supplement (PMC10145165; doi:10.3389/fendo.2023.1149168), 2023-04-14
Supplement: Table_1.pdf [file Table_1.pdf]

## SUPPLEMENTAL MATERIALS

**Supplemental Table 1.** Nucleotide sequences of primers used for quantitative RT-PCR detection for mRNA

| Gene           | Primer sequence (5' to 3') | Size |
|----------------|----------------------------|------|
| ALP (mouse)    | F: CCAACTCTTTTGTGCCAGAGA   | 21   |
|                | R: GGCTACATTGGTGTTGAGCTTTT | 23   |
| Runx2(mouse)   | F: GAAATGCCTCCGCTGTTATG    | 20   |
|                | R: AGGTGAAACTCTTGCCTCGTC   | 21   |
| Sp7(mouse)     | F: ATGGCGTCCTCTCTGCTTG     | 19   |
|                | R: TGAAAGGTCAGCGTATGGCTT   | 21   |
| Fabp4(mouse)   | F: AAGGTGAAGAGCATCATAACCCT | 23   |
|                | R: TCACGCCTTTCATAACACATTCC | 23   |
| Pparg(mouse)   | F: ATGGTTGACACAGAGATGC     | 19   |
|                | R: GAATGCGAGTGGTCTTCC      | 18   |
| ANGPTL2(mouse) | F: AGCCTGAGAATACCAACCGC    | 20   |
|                | R: CCCTTGCTTATAGGTCTCCCAG  | 22   |

Note: F, forward primer; R, reverse primer; Size, primer size.
